# Supplementary material for: Development of a Web-Based 24-h Dietary Recall for a French-Canadian Population
Source: Nutrients. 2016 Nov 15;8(11):724. doi: 10.3390/nu8110724 (PMC5133109; doi:10.3390/nu8110724)
Supplement: Supplementary file 1 [file nutrients-08-00724-s001.docx]

Supplementary Materials: Development of
a Web-Based 24-h Dietary Recall for
a French-Canadian Population

Simon Jacques, Simone Lemieux, Benoît Lamarche, Catherine Laramée, Louise Corneau,
Annie Lapointe, Maude Tessier-Grenier and Julie Robitaille

**Table S1.** Distribution of the 2865 food items in the web-based 24-h recall (R24W) **1**.

| **Food Category** | **Number of Items** | **Item Subcategory** | **Number of Items** |
| --- | --- | --- | --- |
| **Vegetables/Fruits** | 227 | Vegetable juice | 3 |
| Vegetable | 142 |
| Fruit | 82 |
| **Bread/Cereal/ baked goods** | 308 | Bread/bagel/English muffin/tortilla | 64 |
| Breakfast cereal | 125 |
| Hot cereal | 28 |
| Bar/muffin/sweet bread | 22 |
| Crackers/croutons | 17 |
| Brioche/turnover/croissant/Danish | 8 |
| Pancake/waffle/french toast | 28 |
| Flour/breadcrumbs/wheat germ/semolina/bran | 13 |
| **Pasta/rice/other grains** | 80 | Pasta | 23 |
| Rice/other grain | 57 |
| **Milk/Dairy products/Milk substitutes** | 127 | Milk | 31 |
| Plant-based drink (soy, almond, etc.) | 6 |
| Ice cream/frozen dessert | 20 |
| Milk-based dessert | 21 |
| Cheese | 30 |
| Yogurt/Kefir | 19 |
| **Meat/Poultry/Fish and seafood** | 432 | Beef/veal/pork/lamb/horse/game | 187 |
| Poultry | 94 |
| Fish and seafood | 129 |
| Giblets (blood sausage, liver, kidney, brain, foie gras, etc.) | 4 |
| Processed meat (bacon, terrine, pâté, cold cut, etc.) | 18 |
| **Legumes/soy (tofu)/ nuts and seeds** | 100 | Legumes (bean/peas/lens) | 19 |
| Tofu/meatless product | 23 |
| Veggie spread (hummus, vegetarian patty) | 8 |
| Nuts and seeds | 41 |
| Peanut butter/almond/other nut butter (cashew/sesame, etc.) | 9 |
| **Eggs/egg-based dishes** | 65 | Egg | 11 |
| Egg-based dishes | 54 |
| **Mixed dishes** | 1023 | Salad (garden, pasta, couscous, beans, etc.) | 34 |
| Sandwich | 52 |
| Soup | 109 |
| Meat-based dishes (beef, pork, veal, lamb, etc.) | 86 |
| Poultry-based dishes | 66 |
| Fish or seafood-based dishes | 54 |
| Pasta or rice-based dishes | 236 |
| Vegetarian dishes | 42 |
| Cheese-based dishes | 8 |
| Exotic, multiethnic dishes (Asian, Indian, Italian, Mexican, etc.) | 336 |
| **Fast food** | 78 | Fries/poutine/garnished potato | 10 |
| Hamburger/hot dog | 22 |
| Pizza/turnover/calzone/nachos | 37 |
| BBQ chicken/fried chicken/chicken wings | 5 |
| Fried Chicken/Fish nuggets or fillet | 2 |
| Onion rings/garlic bread/pogo-sticks | 2 |
| **Desserts** | 103 | Donut | 8 |
| Cookie | 23 |
| Square/crumble | 6 |
| Cake/brownie/pudding | 37 |
| Fruit jelly (Jell-O®) | 2 |
| Pastries | 12 |
| Pie | 15 |
| **Beverages** | 75 | Alcoholic beverage | 16 |
| Hot beverage (coffee, hot chocolate, tea, herbal tea) | 31 |
| Energy drink (Red bull®, Guru®, Monster®, Rockstar®, etc.) | 3 |
| Soft drink/soda | 8 |
| Sports drink (Gatorade®, Powerade®, etc.) | 3 |
| Water/carbonated water/mineral water | 3 |
| Milkshake/smoothie/slush | 3 |
| Fruit juice | 4 |
| Flavored beverage powder/liquid | 4 |
| **Salted snacks** | 18 | Bretzel | 4 |
| Chips | 4 |
| Popcorn | 8 |
| Other salted snacks | 2 |
| **Meal substitutes/ dietary supplement/ sport nutrition products** | 20 | Bar | 3 |
| Nutritional drink | 12 |
| Energy candy/gel | 2 |
| Yeast powder | 2 |
| Protein powder | 4 |
| **Condiments/sauce/seasoning** | 101 | Broth/consommé/stock | 4 |
| Condiment | 16 |
| Salt-free seasoning/herbs (cumin, paprika, cinnamon, etc.) | 2 |
| Poultry stuffing | 2 |
| Ketchup/chutney/chili sauce | 3 |
| Mayonnaise/salad dressing | 6 |
| Pesto | 2 |
| Sauce | 35 |
| Salt/salt substitute | 5 |
| Spread (hummus, guacamole, tzatziki, etc.) | 5 |
| Dip | 2 |
| Dressing | 19 |
| **Oil and fat** | 32 | Butter | 7 |
| Oil | 16 |
| Margarine | 6 |
| Other type of fat | 3 |
| **Sugar/spread/ chocolate/candy** | 76 | Candy | 10 |
| Chocolate | 10 |
| Non-Dairy Creamer(Coffee-Mate®) | 6 |
| Jam/Jelly | 9 |
| Chewing gum | 2 |
| Syrup/sauce/molasses/honey | 15 |
| Sugar substitute/sweetener (aspartame, sucralose, stevia, etc.) | 6 |
| Sugar | 7 |
| Spread/icing (Nutella®, caramel, etc.) | 7 |
| Other candy | 4 |

**1** This table only classifies each subcategory in one category, although one subcategory may appear in more than one category.
